# Supplementary material
Source: publisher figshare collection journal article supplement (https://tandf.figshare.com/ndownloader/files/22910066)
Supplement: Supplementary file 1 [file 22910066]

THERMAL AND ELECTROCHEMICAL BEHAVIOR OF ACIDIC PYROPHOSPHATE (NH4)2Zn(H2P2O7)2.2H2O

F. Z. Elhafianea*, R. Khaoulafb, M. Harcharrasc, M. Ouakkid and K. Brouzia

aEnergy, Materials and Sustainable Development , EMDD-CERNE2D, Mohammed V University in Rabat, Salé Morocco

bLaboratory of Spectroscopy, Molecular Modeling, Materials, Nanomaterials, Water and Environment, LS3MN2E-CERNE2D, Faculty of Sciences Av Ibn Battouta, Mohammed V University in Rabat, Morocco

cMaterial and Environmental Engineering Laboratory, Modeling and Application, Department of Chemistry, Faculty of Science, Ibn Tofail University, Kenitra, Morocco

dLaboratory of Materials, Electrochemistry and Environment, Faculty of Science, Ibn Tofail University, PB 133-14050 Kénitra, Morocco

Email: [fz.elhafiane@gmail.com](mailto:fz.elhafiane@gmail.com)

**Supplemental Materials**


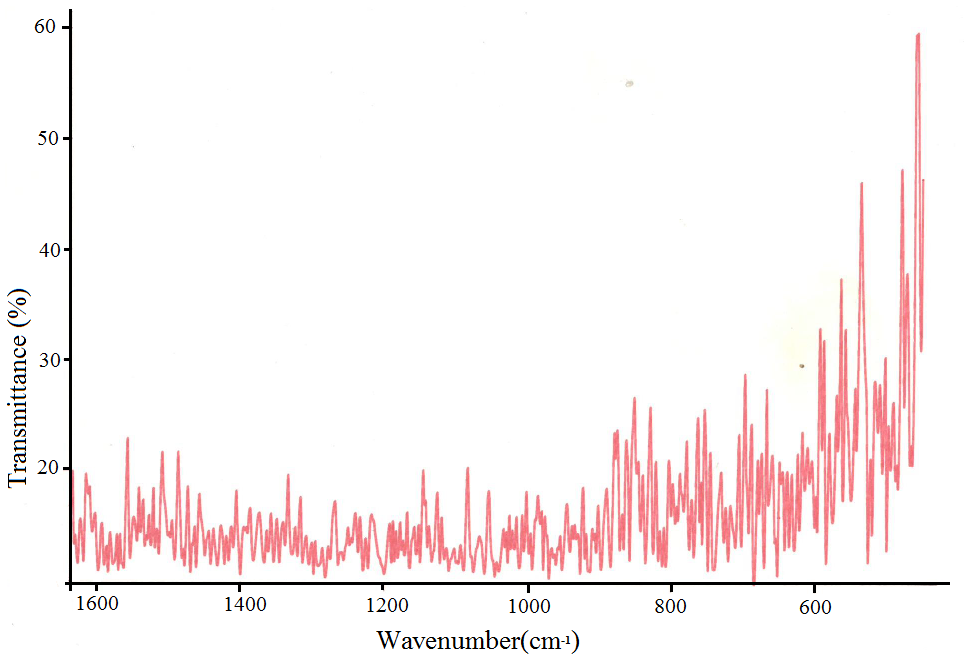


Figure S 1: Infrared Spectrum of (NH4)2Zn(H2P2O7)2.2H2O at 460°C, amorphous phase.


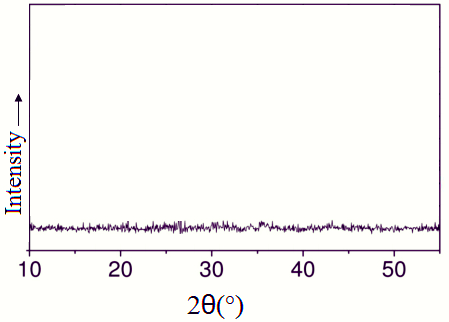


Figure S 2: X-ray powder diffractogram of the (NH4)2Zn(H2P2O7)2.2H2O at 460°C, amorphous.

**
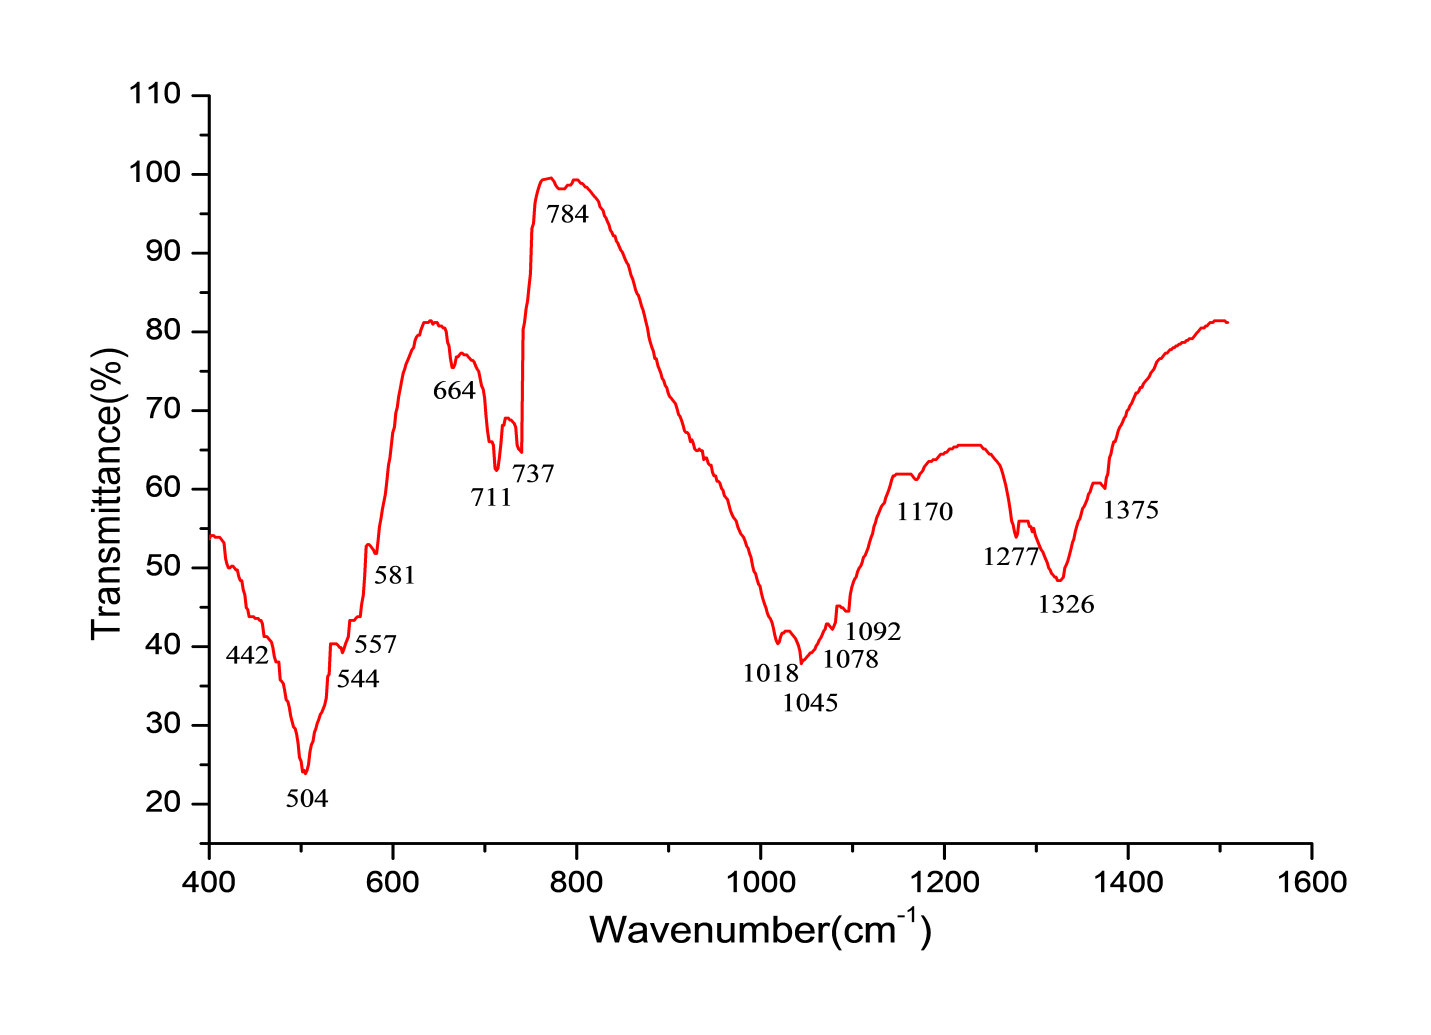
**

Figure S 3: Infrared spectrum of Zn2P4O12 after heating the (NH4)2Zn(H2P2O7)2.2H2O at 910°

Figure S 4: Nyquist diagram for mild steel with selected concentrations of (NH4)2Zn(H2P2O7)2.2H2O


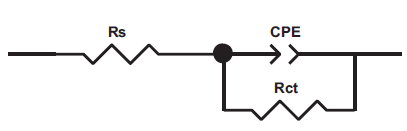


**Figure S 5**: Equivalent circuit model used to fit the impedance spectra

Figure S 6: Langmuir adsorption isotherm in 1.0M HCl solution containing different concentrations of (NH4)2Zn(H2P2O7)2.2H2O

Figure S 7: Arrhenius plots for mild steel corrosion in 1.0 M HCl in the absence and in presence of (NH4)2Zn(H2P2O7)2.2H2O

**Table S 1:** Potentiodynamic polarization parameters for mild steel in 1.0 M HCl with and without different concentrations of (NH4)2Zn (H2P2O7)2.2H2O at 298K.

| **Medium** | **Conc.**  **M** | **-Ecorr mV/SCE** | **icorr**  **µA cm-2** | **-βc**  **mV dec-1** | **βa**  **mV dec-1** | ***η*PP**  **%** |
| --- | --- | --- | --- | --- | --- | --- |
| **HCl 1.0M** | -- | 470 | 714 | 145 | 121 | - |
| **Inh** | 10-3 | 595 | 50 | 97 | 90 | 93.0 |
| 10-4 | 596 | 80 | 91 | 86 | 88.7 |
| 10-5 | 598 | 102 | 102 | 85 | 85.7 |
| 10-6 | 575 | 109 | 98 | 83 | 84.7 |

Table S 2: AC impedance parameters for mild steel in 1.0 M HCl solution with respect to the concentration of (NH4)2Zn (H2P2O7)2.2H2O

|  | **Conc.**  **(M)** | **Rs**  **(Ω cm2)** | **Rct**  **(Ω cm2)** | **Cdl**  **(µF.cm-2 )** | **ndl** | **Q**  **(µF.Sn-1)** | **Ɵ** | ***ƞ*imp**  **%** |
| --- | --- | --- | --- | --- | --- | --- | --- | --- |
| **HCl 1.0M** | -- | 1.9 | 23.4 | 190 | 0.897 | 470 | - | - |
| Inh | 10-3 | 1.6 | 305.5 | 73.7 | 0.853 | 128 | 0.923 | 92.3 |
| 10-4 | 1.4 | 202.8 | 90.8 | 0.854 | 162 | 0.884 | 88.4 |
| 10-5 | 0.9 | 157.9 | 93.9 | 0.827 | 194 | 0.851 | 85.1 |
| 10-6 | 1.3 | 147.1 | 101.2 | 0.865 | 178 | 0.841 | 84.1 |

Table S 3: Polarization parameters for mild steel in 1 M HCl with 10-3 M of (NH4)2Zn(H2P2O7)2.2H2O at various temperatures

| Compounds | Temperature  K | -Ecorr  mV/SCE | icorr  µA cm-2 | -βc  mV dec-1 | βa  mV dec-1 | *η*PP  % |
| --- | --- | --- | --- | --- | --- | --- |
| Blank | 298 | 470 | 714 | 145 | 121 | - |
| 308 | 491 | 950 | 154 | 112 | - |
| 318 | 475 | 1340 | 151 | 126 | - |
| 328 | 465 | 2080 | 159 | 108 | - |
| inh | 298 | 595 | 50 | 97 | 90 | 93.0 |
| 308 | 497 | 92 | 115 | 96 | 90.3 |
| 318 | 495 | 175 | 107 | 112 | 86.9 |
| 328 | 499 | 332 | 100 | 105 | 84.0 |

Table S 4: Corrosion kinetic parameters of mild steel dissolution in 1M HCl in the absence and in the presence of 10−3M of (NH4)2Zn (H2P2O7)2.2H2O

| Conc | Ea (kJ/mol) | ΔHa(kJ/mol) | ΔSa(kJ/mol.K) |
| --- | --- | --- | --- |
| Blank | 28.7 | 26.1 | -102.8 |
| inh | 51.3 | 48.7 | -49.0 |

Table S 5: Crystal Structure and Data Refinement Parameters

| **Compound** | **This work** | **Literature** [10] |
| --- | --- | --- |
| Empirical Formula | (NH4)2Zn(H2P2O7)2.2H2O | |
| Formula Weight | [489.4](file:///C:\Users\DELL\Downloads\1506_A1%20_chemical_formula_weight) | [489.4](file:///C:\Users\DELL\Downloads\1506_A1%20_chemical_formula_weight) |
| Crystal System / Space Group | [Triclinic](file:///C:\Users\DELL\Downloads\1506_A1%20_symmetry_cell_setting), Pī | [Triclinic](file:///C:\Users\DELL\Desktop\Article%202%20révisé\1506_A1%20_symmetry_cell_setting), Pī |
| a / Å | [7.0144 (3)](file:///C:\Users\DELL\Downloads\1506_A1%20_cell_length_a) | 7.0026(2) |
| b / Å | [7.2891 (3](file:///C:\Users\DELL\Downloads\1506_A1%20_cell_length_b)) | 7.3297(2) |
| c / Å | [7.7721 (4)](file:///C:\Users\DELL\Downloads\1506_A1%20_cell_length_c) | 7.7885(3 |
| α / ° | [80.436 (4)](file:///C:\Users\DELL\Downloads\1506_A1%20_cell_angle_alpha) | 81.229(1) |
| β / ° | [70.594 (4)](file:///C:\Users\DELL\Downloads\1506_A1%20_cell_angle_beta) | 71.064(1) |
| γ / ° | [88.654 (4)](file:///C:\Users\DELL\Downloads\1506_A1%20_cell_angle_gamma) | 88.172(1) |
| V / Å3 | [369.38 (3)](file:///C:\Users\DELL\Downloads\1506_A1%20_cell_volume) | 373.64(2) |
| Z | [1](file:///C:\Users\DELL\Downloads\1506_A1%20_cell_formula_units_Z) | 1 |
| D calc (g/cm3) | 2.2001 | 2.175 |
| μ (mm-1) | 2.19 | 2.160 |
| Crystal size (mm) | [0.64](file:///C:\Users\DELL\Downloads\1506_A1%20_exptl_crystal_size_max) × [0.54](file:///C:\Users\DELL\Downloads\1506_A1%20_exptl_crystal_size_mid) × [0.38](file:///C:\Users\DELL\Downloads\1506_A1%20_exptl_crystal_size_min) | 0.19×0.31×0.40 |
| Color / Shape | Colourless /Prism | Colourless/Prism |
| Temp (K) | [120](file:///C:\Users\DELL\Downloads\1506_A1%20_cell_measurement_temperature) | 293 |
| Theta range for collection | 3.41° to 29.49° | 2.81° to 30.00° |
| Reflections collected | 5646 | 5328 |
| Independent reflections | [1839](file:///C:\Users\DELL\Downloads\1506_A1%20_reflns_number_total) | 2055 |
| Data/restraints/parameters | [1839](file:///C:\Users\DELL\Downloads\1506_A1%20_reflns_number_total)/8/130 | 2055/6/135 |
| Goodness of fit on F2 | 1.48 | 1.240 |
| Final R indices [I > 2σ(I)] | R1=0.0228, wR2=0.0784 | R1 =0.0447, wR2 =0.1336 |
| R indices (all data) | R1= 0.0245, wR2= 0.0794 | R1 = 0.0480, wR2=0.1360 |
| Largest difference peak/hole | [0.43](file:///C:\Users\DELL\Downloads\1506_A1%20_refine_diff_density_max) and [-0.39](file:///C:\Users\DELL\Downloads\1506_A1%20_refine_diff_density_min) e Å−3 | 1.295 and -1.168 e Å−3 |
